# Supplementary material for: Identification of Novel Potential Heparanase Inhibitors Using Virtual Screening
Source: MDPI journal article supplement (doi:10.3390/catal12050503), 2022-04-30
Supplement: s1 [file s1]

# Identification of Novel Potential Heparanase Inhibitors Using Virtual Screening

Alfredo Rus, Victor M. Bolanos-Garcia, Agatha Bastida and Paula Morales

## Content

**Figure S1.** Heparanase inhibitors.

**Figure S2.** Workflow used in this study for the identification of novel HPSE inhibitors.

**Table S1.** Heparanases 3D structures retrieved from the Protein Data Bank (PDB).

**Table S2.** Docking scores and reported data of HPSE known inhibitors (\*separate spreadsheet).

**Figure S3.** Ligand interaction diagrams of selected hit HPSE inhibitors ChEMBL2349245, ChEMBL495255, ChEMBL2349247 and ChEMBL4294823.

**Table S3.** Data reported for selected potential HPSE inhibitors.

**Figure S4.** Docking studies of HPSE in complex with selected potential HPSE inhibitors.

**Figure S5.** Ligand interaction diagrams of selected potential HPSE inhibitors.

Figure S1. Heparanase inhibitors.

### Heparin derivatives or sulfated saccharides

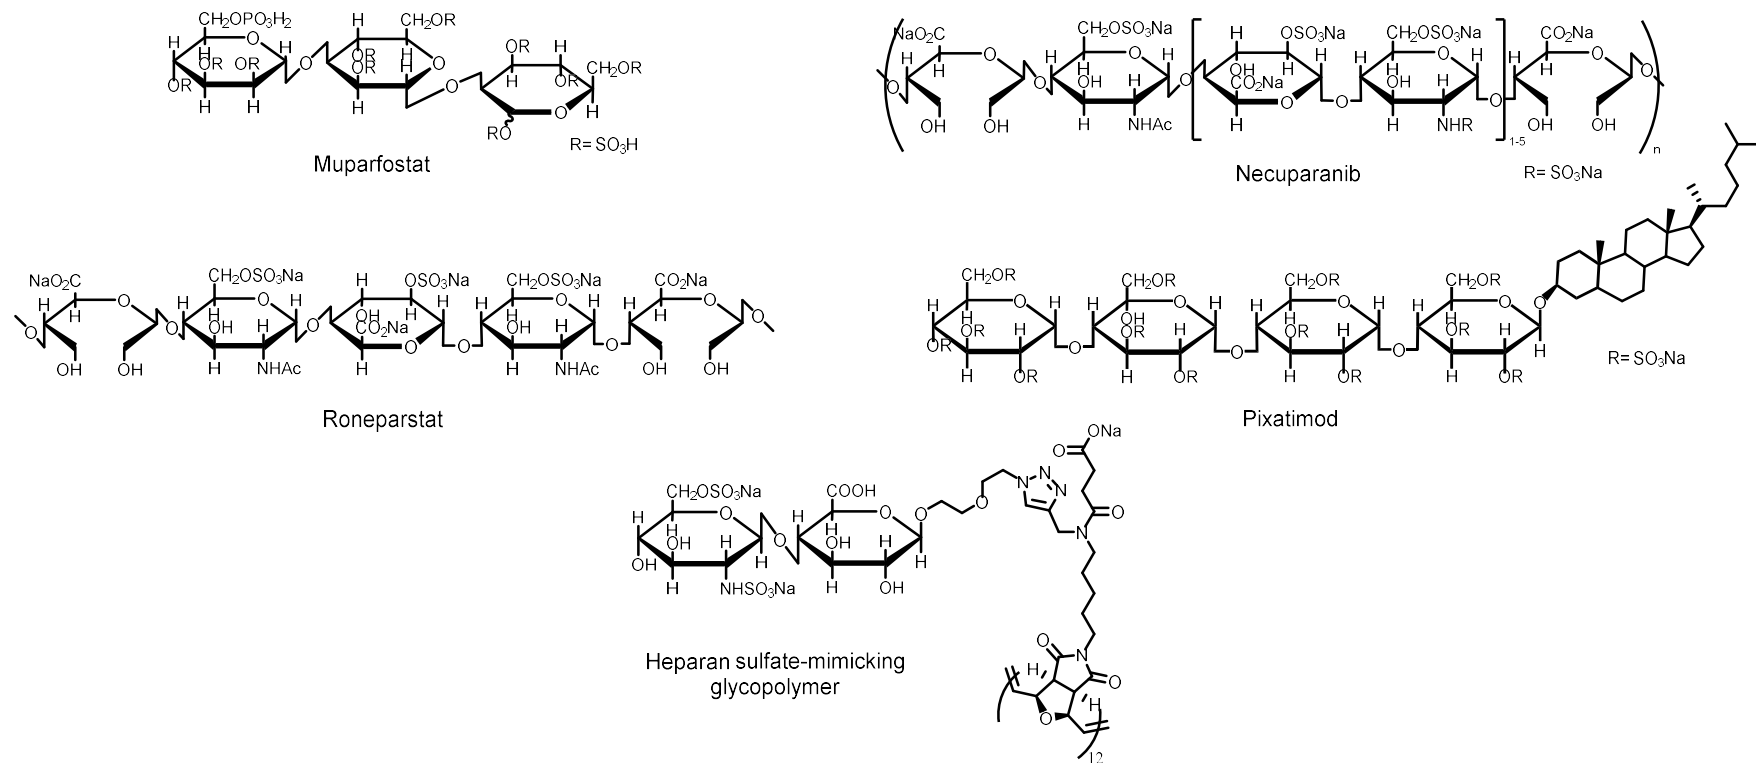

### Natural small molecules

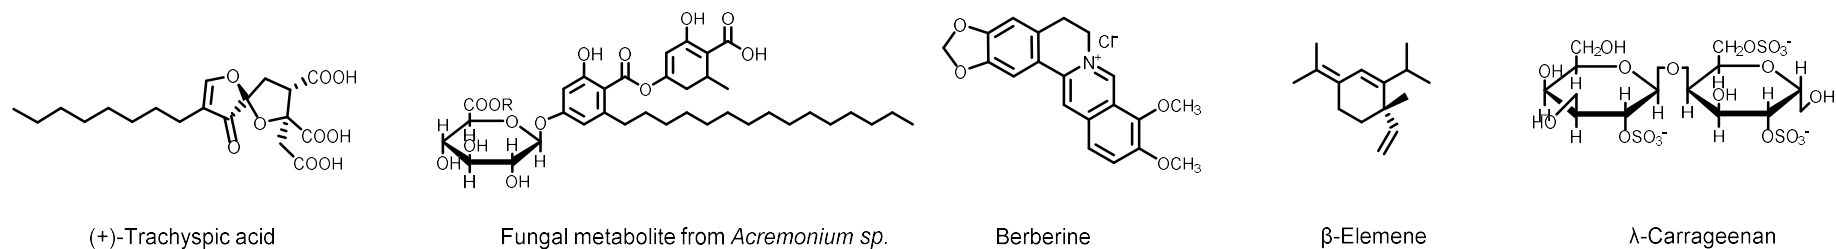

## Synthetic small molecules

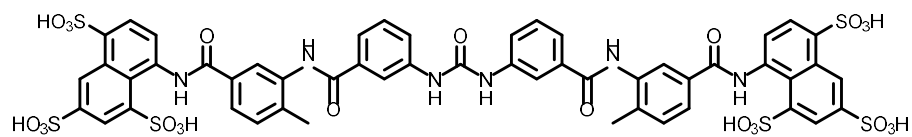

Suramin

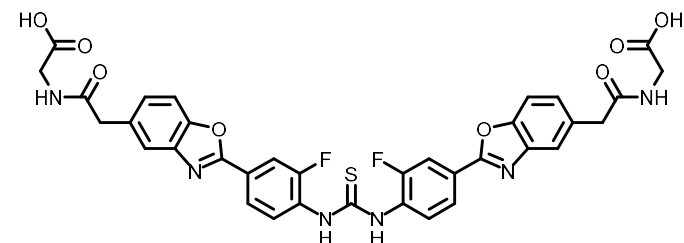

2-phenyl-benzoxazol-5-yl-acetic acid derivative

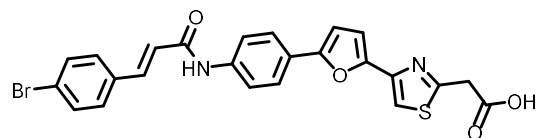

Furanyl-1,3-thiazole-2-yl-acetic acid derivative

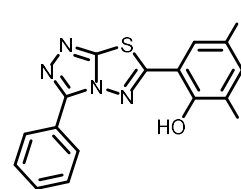

[1,2,4]triazolo[3,4-b][1,3,4]thiadiazole derivative

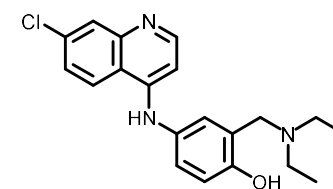

Amodiaquine

**Figure S2.** Workflow used in this study for the identification of novel HPSE inhibitors

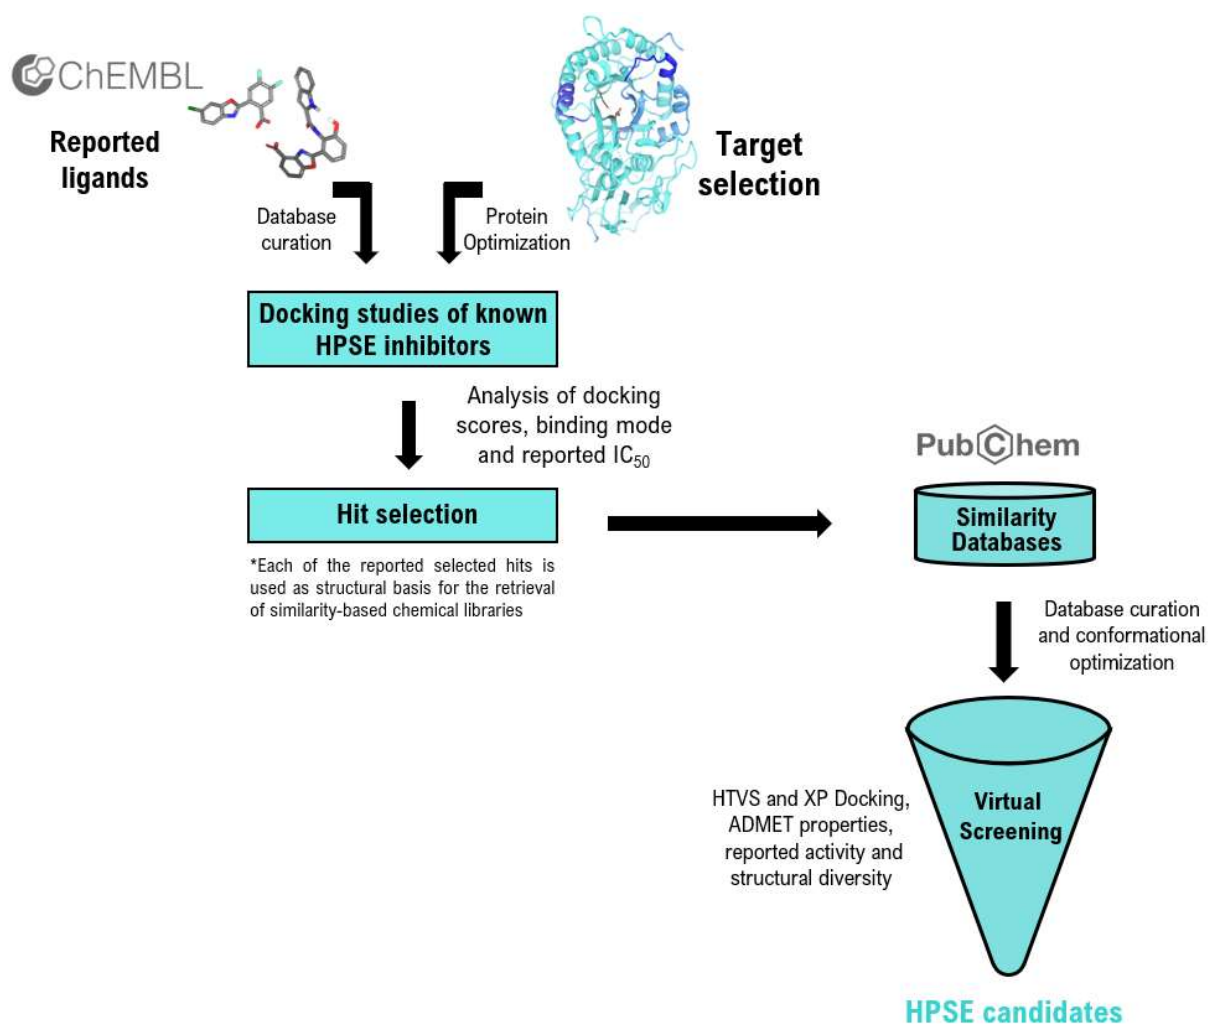



**Table S1.** Heparanases 3D structures retrieved from the Protein Data Bank (PDB).

| PDB ID | Size (kDa) | Resolution (Å) | Mutations       | Co-crystallized Ligands                                                                     | Identity (%) | Organism                         |
|--------|------------|----------------|-----------------|---------------------------------------------------------------------------------------------|--------------|----------------------------------|
| 5L9Z   | 54.04      | 1.57           | E343Q and K307R | 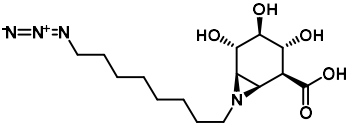<br>GUX   | 99           | <i>Homo sapiens</i>              |
| 5BWI   | 91.09      | 1.60           | No              | None                                                                                        | 23           | <i>Burkholderia pseudomallei</i> |
| 5E98   | 53.79      | 1.63           | No              | <br>BDP   | 99           | <i>Homo sapiens</i>              |
| 5E97   | 54.22      | 1.63           | No              | <br>NDG  | 99           | <i>Homo sapiens</i>              |
| 6ZDM   | 53.71      | 1.71           | No              | <br>QG2 | 99           | <i>Homo sapiens</i>              |
| 5E9C   | 54.15      | 1.73           | No              | <br>SGN | 99           | <i>Homo sapiens</i>              |
| 5E8M   | 54.57      | 1.75           | K307R           | None                                                                                        | 99           | <i>Homo sapiens</i>              |

|      |       |      |       |         |    |                     |
|------|-------|------|-------|---------|----|---------------------|
| 5E9B | 53.91 | 1.88 | No    | <br>BDP | 99 | <i>Homo sapiens</i> |
| 5L9Y | 53.63 | 1.88 | No    | <br>6S6 | 99 | <i>Homo sapiens</i> |
| 5LA4 | 59.43 | 1.90 | K307R | None    | 99 | <i>Homo sapiens</i> |
| 5LA7 | 59.69 | 1.94 | K307R | <br>6S6 | 99 | <i>Homo sapiens</i> |

**GUX:** (1{R},2{S},3{R},4{S},5{S},6{R})-7-[8-[(azanylidene-4)-azanylidene]amino]octyl]-3,4,5-tris(oxidanyl)-7-azabicyclo[4.1.0]heptane-2-carboxylic acid; **BDP:** beta-D-glucopyranuronic acid-(1-4)-2-deoxy-2-(sulfoamino)-alpha-D-glucopyranose-(1-4)-beta-D-glucopyranuronic acid; **NDG:** 2-acetamido-2-deoxy-alpha-D-glucopyranose-(1-4)-beta-D-glucopyranuronic acid-(1-4)-2-acetamido-2-deoxy-alpha-D-glucopyranose-(1-4)-beta-D-glucopyranuronic acid; **QG2:** (2~{S},3{S},4{R},5{R},6{S})-3-[(2{R},3{R},4{R},5{S},6{R})-4,5-bis(oxidanyl)-3-(sulfoamino)-6-(sulfooxymethyl)oxan-2-yl]oxy-6-(4-methyl-2-oxidanylidene-chromen-7-yl)oxy-4,5-bis(oxidanyl)oxane-2-carboxylic acid; **SGN:** 4-deoxy-2-O-sulfo-alpha-L-threo-hex-4-enopyranuronic acid-(1-4)-2-deoxy-6-O-sulfo-2-(sulfoamino)-alpha-D-glucopyranose-(1-4)-alpha-L-idopyranuronic acid-(1-4)-2-deoxy-6-O-sulfo-2-(sulfoamino)-beta-D-glucopyranose; **6S6:** 2-acetamido-2-deoxy-beta-D-glucopyranose-(1-4)-[alpha-L-fucopyranose-(1-6)]2-acetamido-2-deoxy-beta-D-glucopyranose.

**Figure S3.** Ligand interaction diagrams of selected hit HPSE inhibitors ChEMBL2349245, ChEMBL495255, ChEMBL2349247 and ChEMBL4294823.

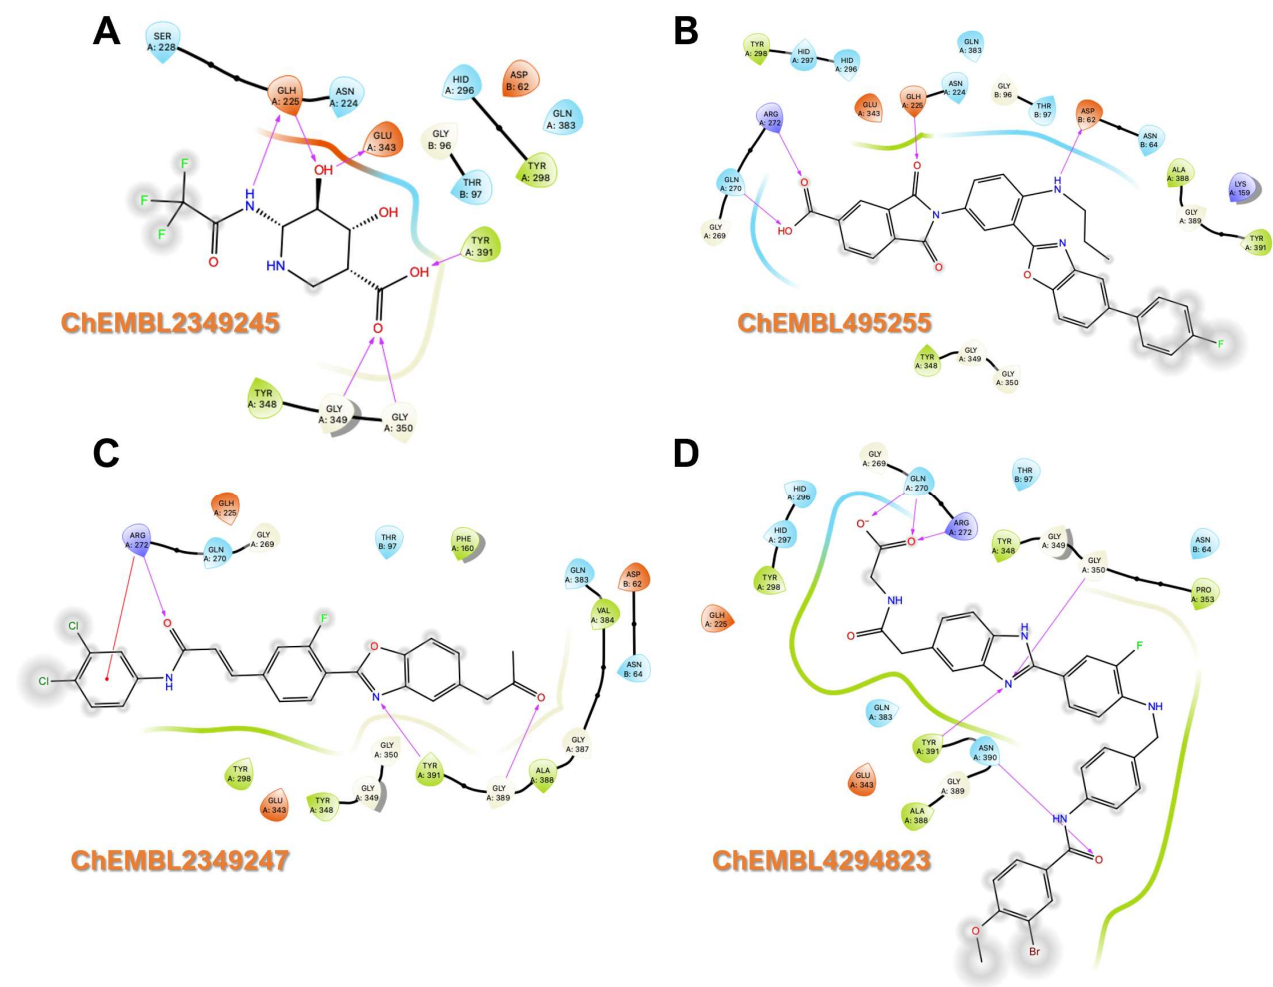

**Table S3.** Data reported for selected potential HPSE inhibitors.

| Compound ID   | HPSE<br>IC <sub>50</sub> (μM) | Reported Targets       | References |
|---------------|-------------------------------|------------------------|------------|
| ChEMBL2349245 | 1.00                          | HPSE                   | [40]       |
| 101687126     | NR                            | NR                     | [44]       |
| 61187649      | NR                            | NR                     | [45]       |
| 107828179     | NR                            | NR                     | [46]       |
| 66265156      | NR                            | NR                     | [47]       |
| 113327907     | NR                            | NR                     | [64]       |
| ChEMBL495255  | 0.50                          | HPSE                   | [36]       |
| 25158919      | NR                            | Leishmania<br>donovani | [48]       |
| 23794729      | NR                            | NR                     | [49]       |
| 103430682     | NR                            | NR                     | [50]       |
| 119243009     | NR                            | NR                     | [51]       |
| ChEMBL2349247 | 0.20                          | HPSE                   | [36]       |
| 81421830      | NR                            | NR                     | [52]       |
| 58743027      | NR                            | NR                     | [53]       |
| 155906206     | NR                            | NR                     | [54]       |
| 23886486      | NR                            | NR                     | [55]       |
| 6968873       | NR                            | NR                     | [56]       |

NR: Not reported

**Figure S4.** Docking studies of HPSE in complex with selected potential HPSE inhibitors (A) ChEMBL2349245-based chemical library: 61187649, 107828179, 66265156 and 113327907; (B) ChEMBL495255-based chemical library: 23794729, 103430682 and 119243009; and (C) ChEMBL2349247-based chemical library: 58743027, 155906206, 23886486 and 6968873).

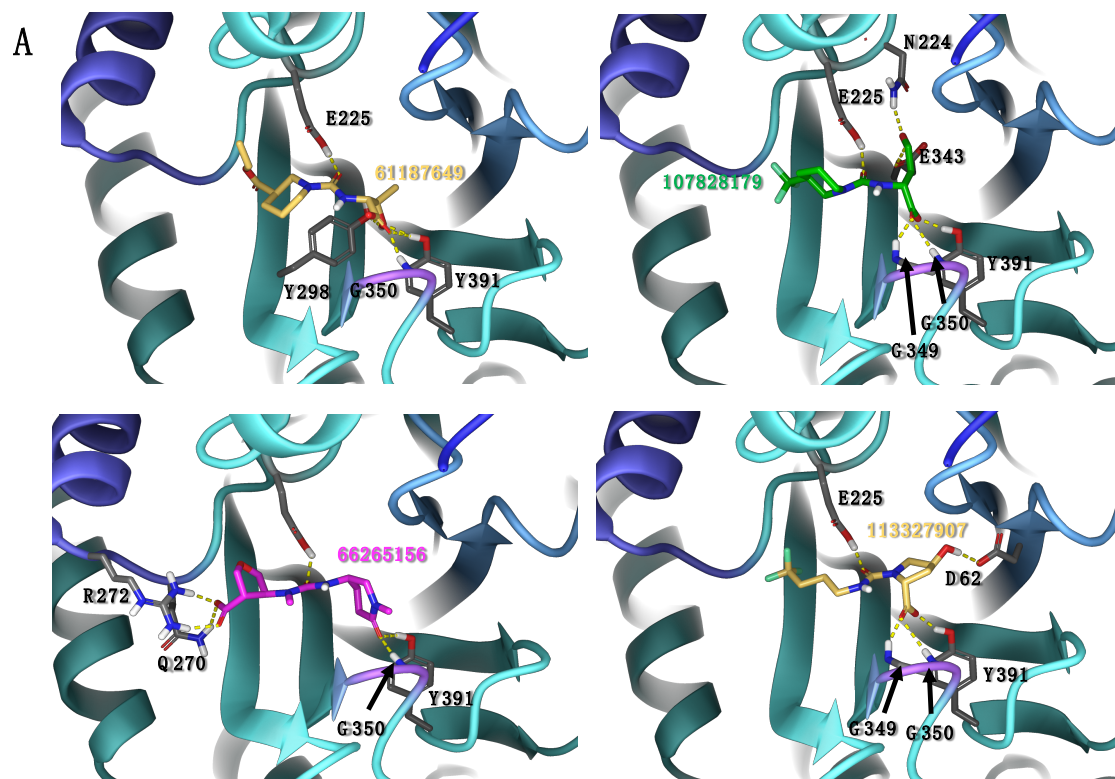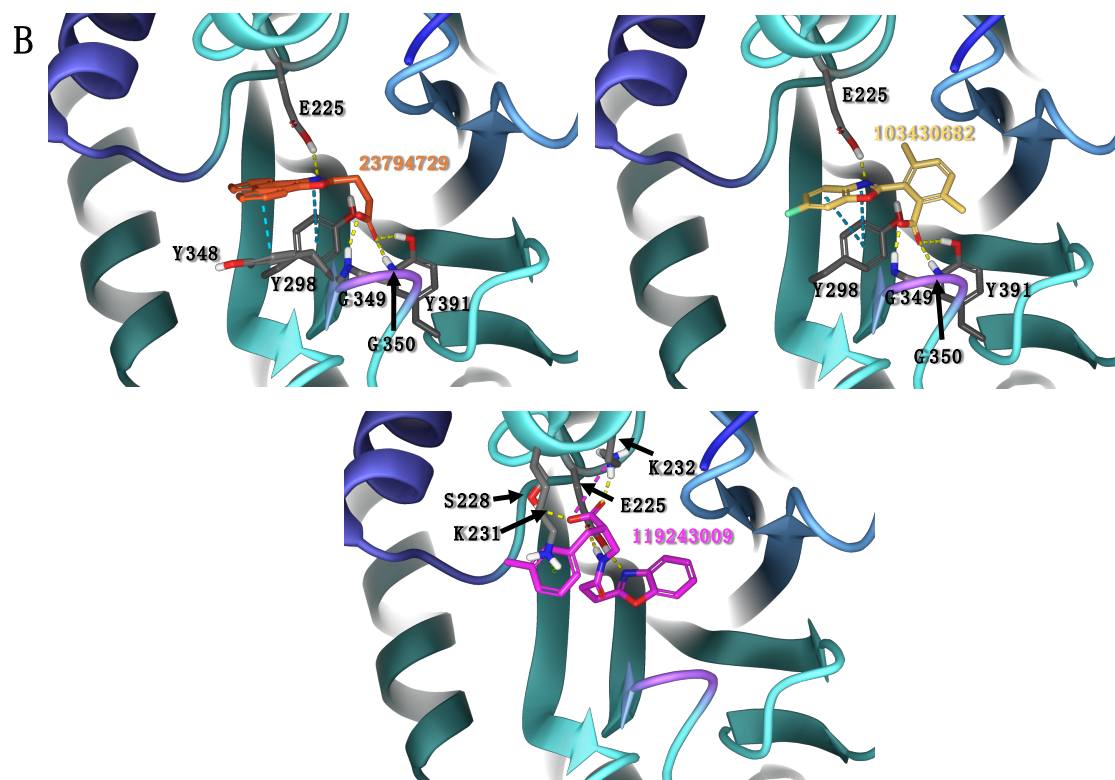

C

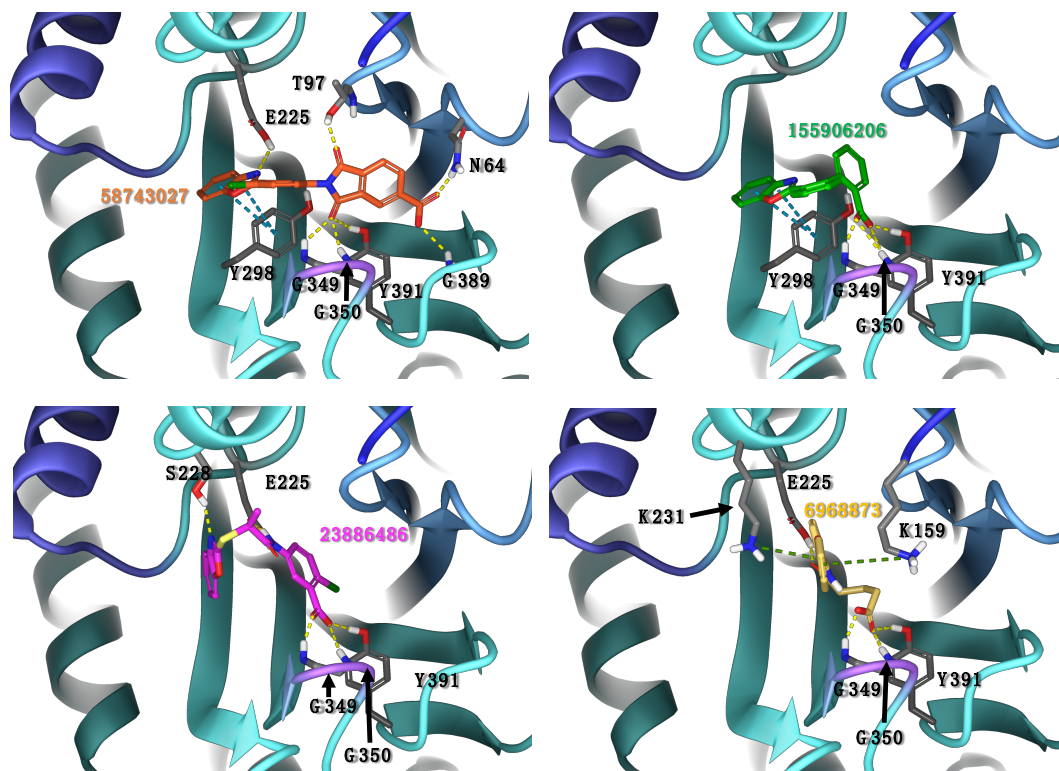

**Figure S5.** Ligand interaction diagrams of the 14 selected potential HPSE inhibitors. (A) ChEMBL2349245-based chemical library: 101687126, 61187649, 107828179, 66265156 and 113327907; (B) ChEMBL495255-based chemical library: 25158919, 23794729, 103430682 and 119243009; and (C) ChEMBL2349247-based chemical library: 81428180, 58743027, 155906206, 23886486 and 6968873).

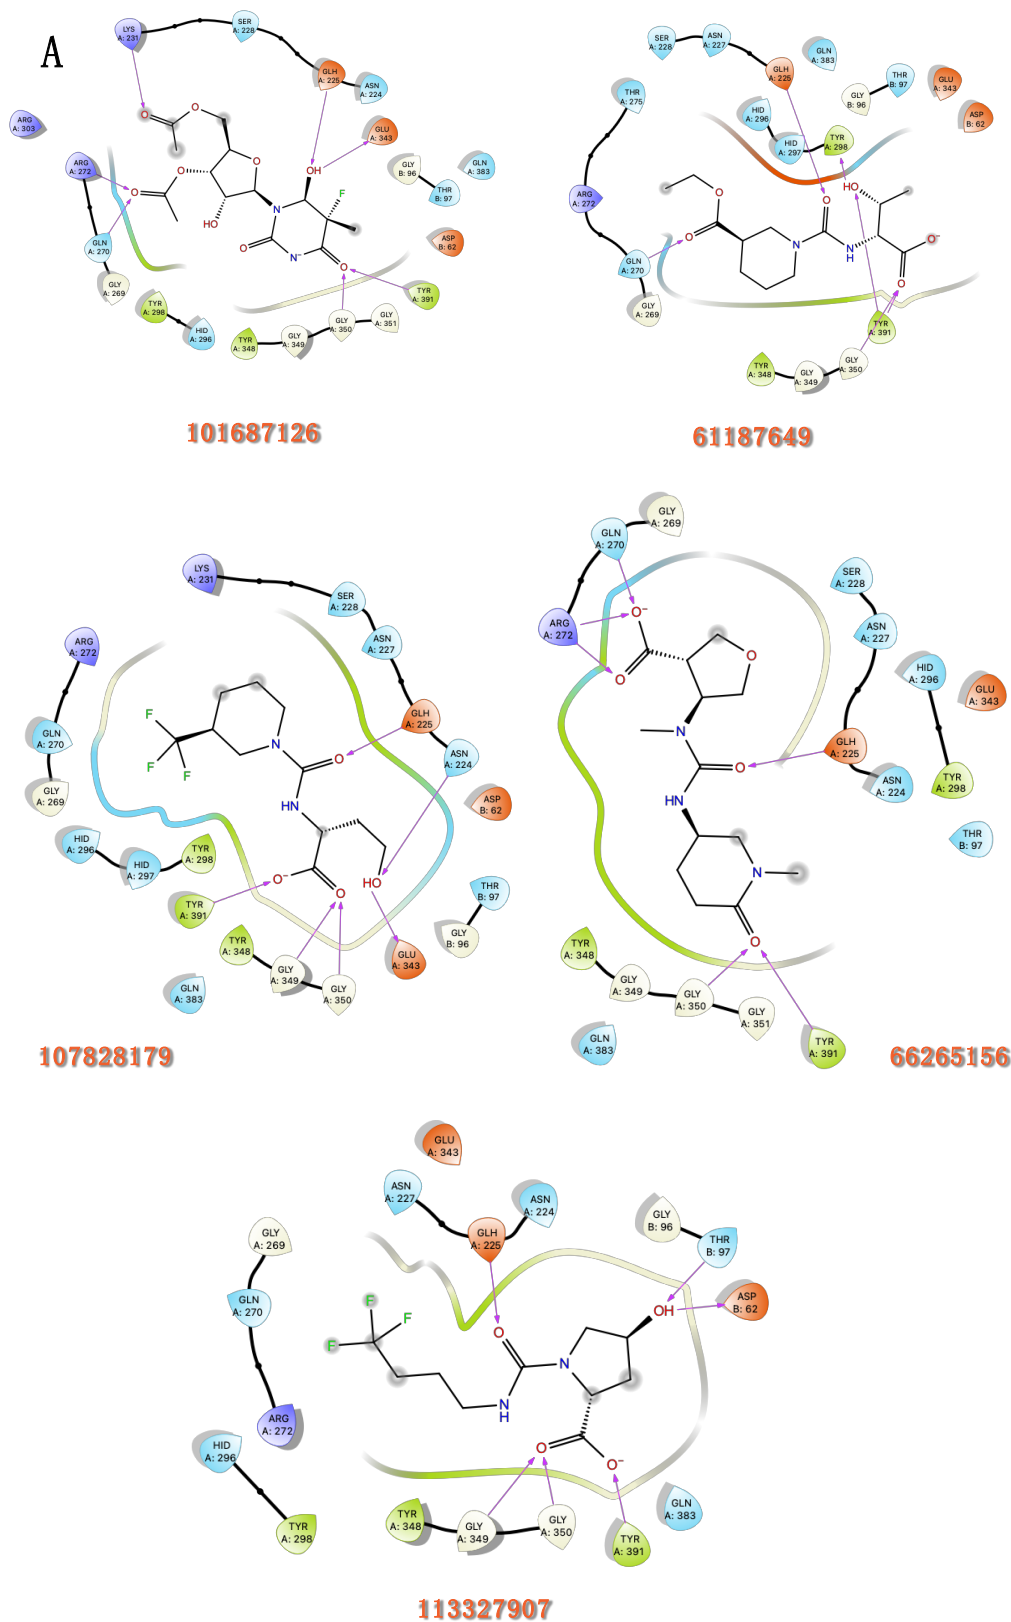

B

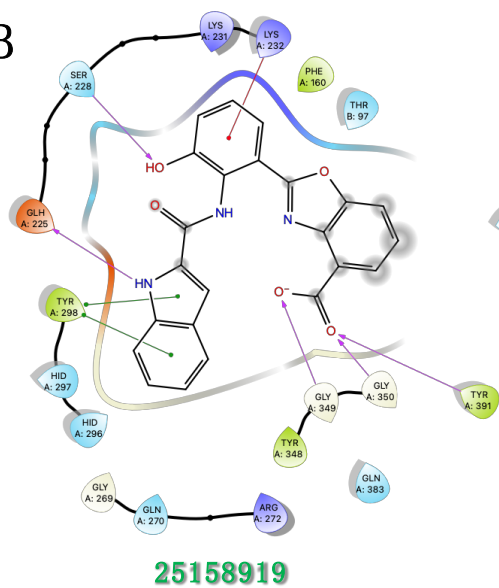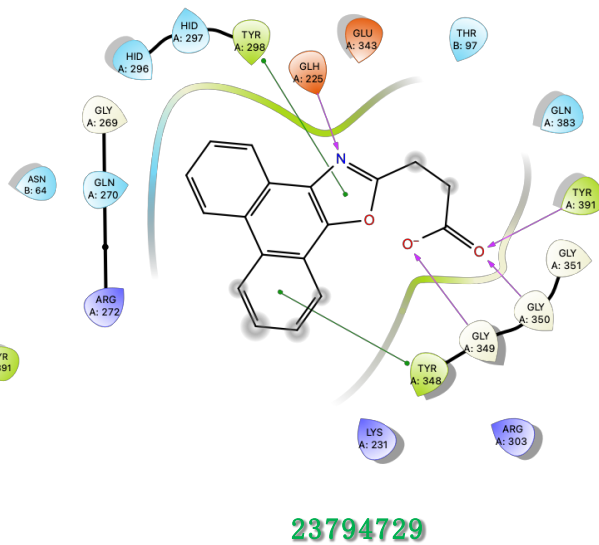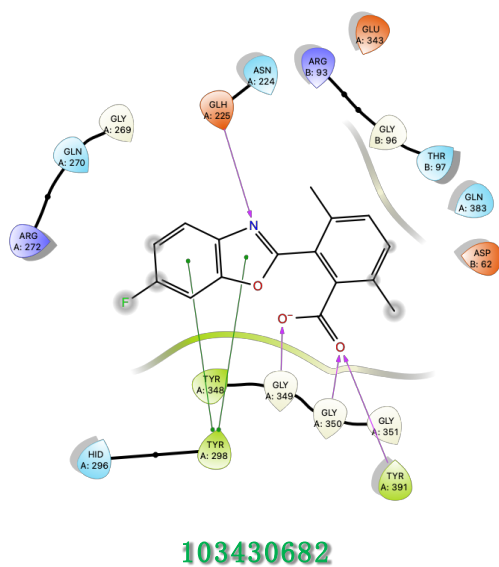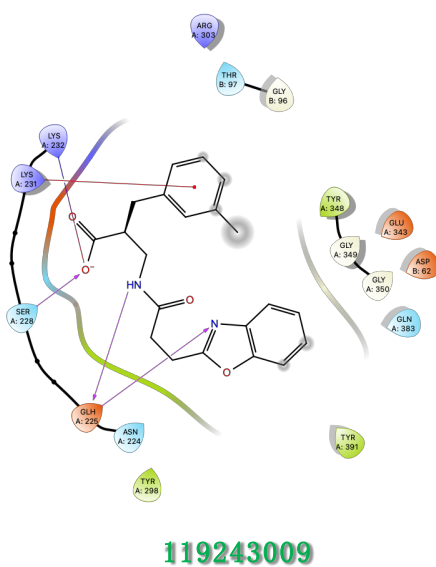



C

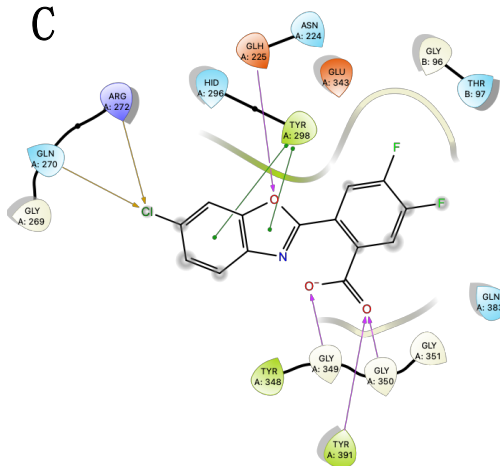

81428180

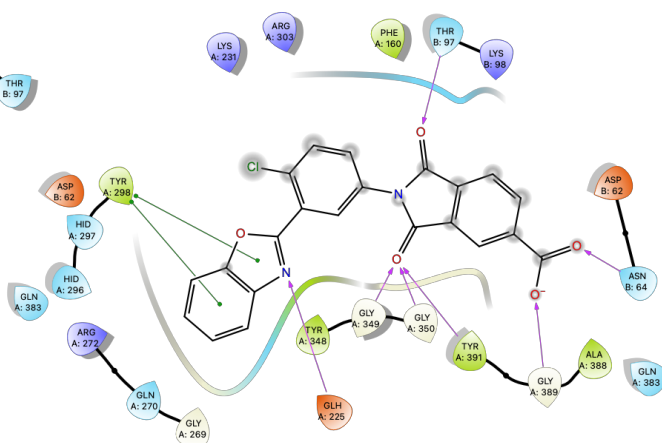

58743027

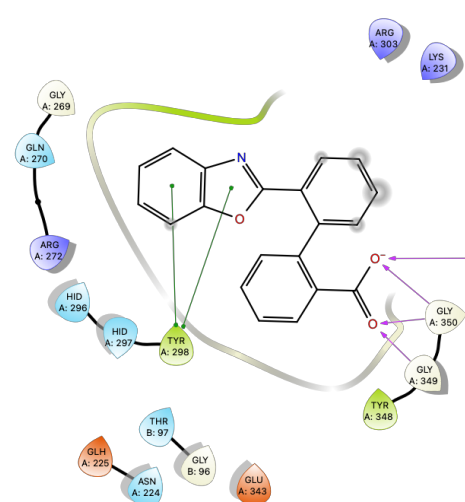

155906206

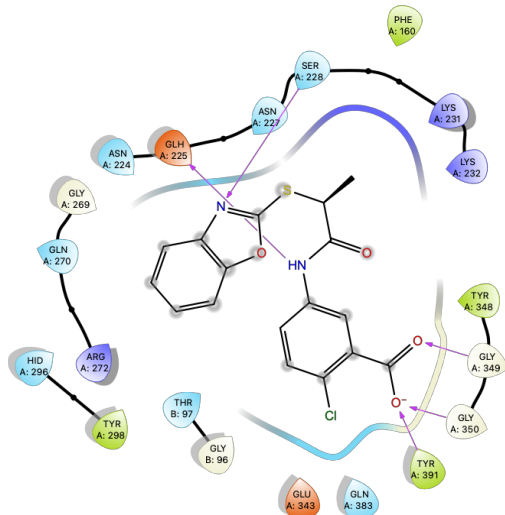

23886486

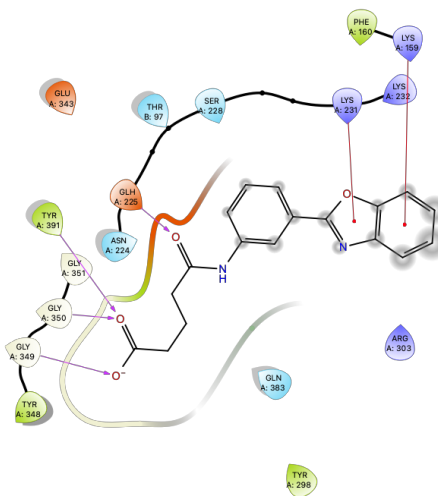

6968873

## References

- 36 Gozalbes, R.; Mosulén, S.; Ortí, L.; Rodríguez-Díaz, J.; Carbajo, R.J.; Melnyk, P.; Pineda-Lucena, A. Hit identification of novel heparanase inhibitors by structure- and ligand-based approaches. *Bioorganic Med. Chem.* 2013, 21, 1944–1951.
- 40 Takahashi, H.; Matsumoto, H.; Smirkin, A.; Itai, T.; Nishimura, Y.; Tanaka, J. Involvement of heparanase in migration of microglial cells. *Biochim. Biophys. Acta—Gen. Subj.* **2008**, 1780, 709–715, doi:10.1016/j.bbagen.2007.12.014.
- 44 1-(3-O,5-O-Diacetyl-beta-D-ribofuranosyl)-5-methyl-5-fluoro-6-hydroxydihydropyrimidine-2,4(1H,3H)-dione | C<sub>14</sub>H<sub>19</sub>FN<sub>2</sub>O<sub>9</sub>—PubChem Available online: <https://pubchem.ncbi.nlm.nih.gov/compound/101687126> (accessed on 10 March 2022).
- 45 2-[(3-Ethoxycarbonylpiperidine-1-carbonyl)amino]-3-hydroxybutanoic acid | C<sub>13</sub>H<sub>22</sub>N<sub>2</sub>O<sub>6</sub>—PubChem Available online: <https://pubchem.ncbi.nlm.nih.gov/compound/61187649> (accessed on 10 March 2022).
- 46 (2R)-4-hydroxy-2-[[3-(trifluoromethyl)piperidine-1-carbonyl]amino]butanoic acid | C<sub>11</sub>H<sub>17</sub>F<sub>3</sub>N<sub>2</sub>O<sub>4</sub>—PubChem Available online: <https://pubchem.ncbi.nlm.nih.gov/compound/107828179> (accessed on 10 March 2022).
- 47 4-[Methyl-[(1-methyl-6-oxopiperidin-3-yl)carbamoyl]amino]oxolane-3-carboxylic acid | C<sub>13</sub>H<sub>21</sub>N<sub>3</sub>O<sub>5</sub>—PubChem Available online: <https://pubchem.ncbi.nlm.nih.gov/compound/66265156> (accessed on 10 March 2022).
48. Tipparaju, S.K.; Joyasawal, S.; Pieroni, M. In Pursuit of Natural Product Leads : Analogues : Discovery of. **2008**, 7344–7347.
49. 3-Phenanthro[9,10-d][1,3]oxazol-2-ylpropanoic acid | C<sub>18</sub>H<sub>13</sub>NO<sub>3</sub>—PubChem Available online: <https://pubchem.ncbi.nlm.nih.gov/compound/23794729> (accessed on 10 March 2022).
50. 2-(6-Fluoro-1,3-benzoxazol-2-yl)-3,6-dimethylbenzoic acid | C<sub>16</sub>H<sub>12</sub>FN<sub>2</sub>O<sub>3</sub>—PubChem Available online: <https://pubchem.ncbi.nlm.nih.gov/compound/103430682> (accessed on 10 March 2022).
51. 2-[[3-(1,3-Benzoxazol-2-yl)propanoylamino]methyl]-3-(3-methylphenyl)propanoic acid | C<sub>21</sub>H<sub>22</sub>N<sub>2</sub>O<sub>4</sub>—PubChem Available online: <https://pubchem.ncbi.nlm.nih.gov/compound/119243009> (accessed on 10 March 2022).
52. 2-(6-Chloro-1,3-benzoxazol-2-yl)-4,5-difluorobenzoic acid | C<sub>14</sub>H<sub>6</sub>ClF<sub>2</sub>NO<sub>3</sub>—PubChem Available online: <https://pubchem.ncbi.nlm.nih.gov/compound/81421830> (accessed on 10 March 2022).
53. Stephen, I.; Courtney, M.; Hay, P.A.; Ian, D.; Scopes, C.; Gb, O. PHTHALIMIDE CARBOXYLIC ACID DERIVATIVES (US-7138425-B2) 2006.
54. 2'-(Benzo[d]oxazol-2-yl)-[1,1'-biphenyl]-2-carboxylate | C<sub>20</sub>H<sub>12</sub>NO<sub>3</sub>—PubChem Available online: <https://pubchem.ncbi.nlm.nih.gov/compound/155906206> (accessed on 10 March 2022).
55. 5-[2-(1,3-Benzoxazol-2-ylsulfanyl)propanoylamino]-2-chlorobenzoic acid | C<sub>17</sub>H<sub>13</sub>ClN<sub>2</sub>O<sub>4</sub>S—PubChem Available online:

<https://pubchem.ncbi.nlm.nih.gov/compound/23886486> (accessed on 10 March 2022).

56. 5-[3-(1,3-Benzoxazol-2-yl)anilino]-5-oxopentanoate |  $C_{18}H_{15}N_2O_4$ —PubChem Available online: <https://pubchem.ncbi.nlm.nih.gov/compound/6968873> (accessed on 10 March 2022).

64 4-Hydroxy-1-(4,4,4-trifluorobutylcarbamoyl)pyrrolidine-2-carboxylic acid |  $C_{10}H_{15}F_3N_2O_4$ —PubChem Available online: <https://pubchem.ncbi.nlm.nih.gov/compound/113327907> (accessed on 10 March 2022).
